# Supplementary material for: Primary Production in the Kara, Laptev, and East Siberian Seas
Source: MDPI journal article supplement (doi:10.3390/microorganisms11081886), 2023-07-26
Supplement: s1 [file s1]

**Table S1.** Total chl-*a* concentrations, hourly primary production rate, and freshwater content of each sampling station in the Kara Sea, the Laptev Sea, and the East Siberian Sea.

| Region            | Year | Station  | Total chl- <i>a</i><br>(mg chl- <i>a</i> m <sup>-2</sup> ) | Primary production rate<br>(mg C m <sup>-2</sup> h <sup>-1</sup> ) | Freshwater content<br>(m) |
|-------------------|------|----------|------------------------------------------------------------|--------------------------------------------------------------------|---------------------------|
| Kara Sea          | 2013 | AF091    | 57.5                                                       | 9.2                                                                | 2.0                       |
|                   |      | AF095    | 20.4                                                       | 3.6                                                                | 3.5                       |
|                   |      | AF100    | 29.2                                                       | 4.9                                                                | 2.6                       |
|                   |      | AF116    | 11.7                                                       | 1.0                                                                | 1.5                       |
|                   | 2015 | AT003    | 30.9                                                       | 3.6                                                                | 1.7                       |
|                   |      | AT079    | 9.9                                                        | 2.3                                                                | 2.2                       |
|                   |      | AT088    | 10.3                                                       | 4.4                                                                | 3.7                       |
| Laptev Sea        | 2013 | AF005    | 23.1                                                       | 0.4                                                                | 2.7                       |
|                   |      | AF006    | 26.9                                                       | 5.9                                                                | 3.2                       |
|                   |      | AF011    | 26.1                                                       | 4.6                                                                | 4.8                       |
|                   |      | AF019    | 44.1                                                       | 17.6                                                               | 3.0                       |
|                   |      | AF024    | 11.3                                                       | 1.6                                                                | 4.6                       |
|                   |      | AF036    | 9.9                                                        | 3.9                                                                | 6.9                       |
|                   |      | AF049    | 58.0                                                       | 4.0                                                                | 5.2                       |
|                   |      | AF057    | 25.1                                                       | 4.1                                                                | 4.3                       |
|                   |      | AF061    | 39.2                                                       | 6.1                                                                | 3.1                       |
|                   |      | AF068    | 24.3                                                       | 4.8                                                                | 2.0                       |
|                   |      | AF071    | 13.4                                                       | 1.2                                                                | 4.2                       |
|                   |      | AF072    | 15.5                                                       | 3.0                                                                | 3.0                       |
|                   |      | AF080    | 15.3                                                       | 2.0                                                                | 1.9                       |
|                   | 2015 | AT014    | 20.5                                                       | 4.5                                                                | 3.7                       |
|                   |      | AT022    | 17.3                                                       | 4.8                                                                | 4.1                       |
|                   |      | AT029    | 17.8                                                       | 4.4                                                                | 3.7                       |
|                   |      | AT034    | 14.7                                                       | 2.4                                                                | 0.6                       |
|                   |      | AT074    | 11.7                                                       | 1.9                                                                | 3.9                       |
|                   |      | AT077    | 13.6                                                       | 3.6                                                                | 2.5                       |
|                   | 2018 | AT18-28  | 23.9                                                       | 0.3                                                                | 3.2                       |
|                   |      | AT18-31  | 16.7                                                       | 2.7                                                                | 3.7                       |
|                   |      | AT18-35  | 26.9                                                       | 7.4                                                                | 2.6                       |
|                   |      | AT18-42  | 12.1                                                       | 6.4                                                                | 2.8                       |
|                   |      | AT18-47  | 7.8                                                        | 4.6                                                                | 6.2                       |
|                   |      | AT18-55  | 16.2                                                       | 1.6                                                                | 3.8                       |
|                   |      | AT18-59  | 13.1                                                       | 4.6                                                                | 5.9                       |
|                   |      | AT18-108 | 13.6                                                       | 5.6                                                                | 5.2                       |
|                   |      | AT18-122 | 20.6                                                       | 3.0                                                                | 2.6                       |
| East Siberian Sea | 2013 | AF041    | 13.5                                                       | 2.5                                                                | 7.5                       |
|                   |      | AF044    | 9.9                                                        | 3.0                                                                | 7.6                       |
|                   | 2015 | AT041    | 15.2                                                       | 2.4                                                                | 5.6                       |
|                   |      | AT046    | 20.6                                                       | 5.8                                                                | 11.4                      |
|                   |      | AT053    | 16.6                                                       | 2.4                                                                | 11.5                      |
|                   |      | AT060    | 14.1                                                       | 2.1                                                                | 15.8                      |
|                   |      | AT066    | 19.7                                                       | 1.5                                                                | 17.1                      |
|                   |      | AT071    | 18.7                                                       | 5.2                                                                | 11.0                      |
|                   | 2018 | AT18-66  | 6.9                                                        | 1.4                                                                | 7.5                       |
|                   |      | AT18-70  | 5.2                                                        | 0.8                                                                | 4.8                       |
|                   |      | AT18-75  | 6.0                                                        | 0.7                                                                | 9.8                       |
|                   |      | AT18-81  | 10.7                                                       | 2.0                                                                | 9.5                       |
|                   |      | AT18-85  | 7.8                                                        | 2.7                                                                | 10.1                      |
|                   |      | AT18-96  | 7.6                                                        | 1.5                                                                | 7.6                       |
|                   |      | AT18-97  | 9.5                                                        | 1.1                                                                | 7.9                       |
